# Supplementary material for: Efficacy and safety of endoscopic duodenal stent versus endoscopic or surgical gastrojejunostomy to treat malignant gastric outlet obstruction: systematic review and meta-analysis
Source: PubMed Central journal article supplement — Endosc Int Open. 2022 Jun 10;10(6):E874–97. doi: 10.1055/a-1794-0635 (PMC9187371; doi:10.1055/a-1794-0635), 2022-06-10
Supplement: 2566supmat_10-1055-a-1794-0635.pdf [file 2566supmat_10-1055-a-1794-0635.pdf]

## Supplementary material

## APPENDIX

Appendix to: Krishnamoorthi R, Bomman S, Benias P, et al. Efficacy and safety of endoscopic duodenal stent versus endoscopic or surgical gastrojejunostomy to treat malignant gastric outlet obstruction: systematic review and meta-analysis

**eTable 1.** Search strategy.

Database Used: Embase and MEDLINE (via Embase.com) January 2015 to February 16, 2021

**Accessed:** February 17, 2021

| No. | Query                                                                                                                                                                                                                                                                                                                                                                                                                              |
|-----|------------------------------------------------------------------------------------------------------------------------------------------------------------------------------------------------------------------------------------------------------------------------------------------------------------------------------------------------------------------------------------------------------------------------------------|
| #13 | #9 OR #11 OR #12                                                                                                                                                                                                                                                                                                                                                                                                                   |
| #12 | #11 NOT ([conference abstract]/lim OR [conference paper]/lim OR [conference review]/lim OR [data papers]/lim OR [editorial]/lim OR [erratum]/lim OR [letter]/lim OR [note]/lim OR [short survey]/lim OR 'case report'/de)                                                                                                                                                                                                          |
| #11 | 'axios' AND ('boston scientific' OR 'boston sci' OR bsci OR bsc) AND [english]/lim AND [humans]/lim AND ([clinical study]/lim OR 'systematic review*:ti) AND [2-7-2020]/sd NOT [17-2-2021]/sd                                                                                                                                                                                                                                      |
| #10 | #7 NOT ([conference abstract]/lim OR [conference paper]/lim OR [conference review]/lim OR [data papers]/lim OR [editorial]/lim OR [erratum]/lim OR [letter]/lim OR [note]/lim OR [short survey]/lim OR 'case report'/de)                                                                                                                                                                                                           |
| #9  | #8 NOT ([conference abstract]/lim OR [conference paper]/lim OR [conference review]/lim OR [data papers]/lim OR [editorial]/lim OR [erratum]/lim OR [letter]/lim OR [note]/lim OR [short survey]/lim OR 'case report'/de)                                                                                                                                                                                                           |
| #8  | (#1 OR #2) AND [english]/lim AND [humans]/lim AND ([clinical study]/lim OR 'systematic review*:ti) AND [2-7-2020]/sd NOT [17-2-2021]/sd                                                                                                                                                                                                                                                                                            |
| #7  | (#5 OR #6) AND [english]/lim AND [humans]/lim AND ([clinical study]/lim OR 'systematic review*:ti) AND [2-7-2020]/sd NOT [17-2-2021]/sd                                                                                                                                                                                                                                                                                            |
| #6  | #3 AND axios AND ('boston scientific' OR 'boston sci' OR bsci OR bsc)                                                                                                                                                                                                                                                                                                                                                              |
| #5  | (#1 OR #2) AND axios AND ('boston scientific' OR 'boston sci' OR bsci OR bsc)                                                                                                                                                                                                                                                                                                                                                      |
| #4  | #1 OR #2                                                                                                                                                                                                                                                                                                                                                                                                                           |
| #3  | ('endoscopic gastrojejunostomy' OR ('bypass surgery' NEAR/5 'gastric outlet obstruction')) AND [english]/lim AND [humans]/lim AND ([clinical study]/lim OR 'systematic review*:ti) AND [2-7-2020]/sd NOT [17-2-2021]/sd                                                                                                                                                                                                            |
| #2  | ('malignant gastric outlet obstruction' OR ('gastric outlet obstruction' NEAR/10 malignant) OR 'malignant gastroduodenal obstruction' OR 'malignant duodenal obstruction' OR 'malignant pyloric obstruction' OR ('gastric outlet obstruction' NEAR/10 benign) OR 'benign gastric outlet obstruction') AND [english]/lim AND [humans]/lim AND ([clinical study]/lim OR 'systematic review*:ti) AND [2-7-2020]/sd NOT [17-2-2021]/sd |
| #1  | ('lumen apposing metal stent*' OR 'lumen apposing metallic stent*' OR 'lumen apposing stent*' OR ('self expandable metallic stent*' NEAR/5 duodenal) OR ('self expandable metal stent*' NEAR/5 duodenal)) AND [english]/lim AND [humans]/lim AND ([clinical study]/lim OR 'systematic review*:ti) AND [2-7-2020]/sd NOT [17-2-2021]/sd                                                                                             |

## Supplementary material

**eTable 2.** Assessment of methodologic quality of studies utilizing a modified Newcastle-Ottawa Scale.**Modified Newcastle-Ottawa Scale questions**

1. Did the patient(s) represent the whole case(s) of the medical center? Cases included represented the general population of gastric outlet obstruction
2. Was the diagnosis correctly made? Were only malignant patients included?
3. Was follow-up long enough for outcomes to occur? Reported adequate follow-up time.
4. Were all important data cited in the report? Reported clinical success and at least 2 outcomes (NR = did not define "clinical success," but study could still score a "Yes" if they reported (undefined) clinical success rate)
5. Was the outcome correctly ascertained? Provided definition of clinical success.

| Study                   | Year | Question 1 |                                                           | Question 2 |    | Question 3 |    | Question 4 |                       | Question 5 |    | Methodologic Quality |
|-------------------------|------|------------|-----------------------------------------------------------|------------|----|------------|----|------------|-----------------------|------------|----|----------------------|
|                         |      | Yes        | No                                                        | Yes        | No | Yes        | No | Yes        | No                    | Yes        | No |                      |
| Chiu <sup>1</sup>       | 2015 | X          |                                                           | X          |    | X          |    | X          |                       | X          |    | Good                 |
| JW Kim <sup>2</sup>     | 2015 | X          |                                                           | X          |    | X          |    | X          |                       | X          |    | Good                 |
| SH Kim <sup>3</sup>     | 2015 | X          |                                                           | X          |    | X          |    | X          |                       | X          |    | Good                 |
| H Lee <sup>4</sup>      | 2015 |            | X (gastric cancer only)                                   | X          |    | X          |    | X          |                       | X          |    | Moderate             |
| JE Lee <sup>5</sup>     | 2015 | X          |                                                           | X          |    | X          |    | X          |                       | X          |    | Good                 |
| D Oh <sup>6</sup>       | 2015 | X          |                                                           | X          |    | X          |    | X          |                       | X          |    | Good                 |
| SY Oh <sup>7</sup>      | 2015 | X          |                                                           | X          |    | X          |    | X          |                       | X          |    | Good                 |
| Park <sup>8</sup>       | 2015 |            | X (gastric cancer only)                                   | X          |    | X          |    | X          |                       | X          |    | Moderate             |
| Sato <sup>9</sup>       | 2015 | X          |                                                           | X          |    | X          |    | X          |                       |            | NR | Moderate             |
| Trotter <sup>10</sup>   | 2015 | X          |                                                           | X          |    | X          |    | X          |                       | X          |    | Good                 |
| Fiori <sup>11</sup>     | 2016 |            | X (metastatic adenocarcinoma of antropyloric region only) | X          |    | X          |    | X          |                       |            | NR | Poor                 |
| Grunwald <sup>12</sup>  | 2016 | X          |                                                           | X          |    | X          |    | X          |                       | X          |    | Good                 |
| Itoi <sup>13</sup>      | 2016 | X          |                                                           | X          |    | X          |    |            | X (few AEs specified) |            | NR | Poor                 |
| Jung <sup>14</sup>      | 2016 | X          |                                                           | X          |    | X          |    | X          |                       | X          |    | Good                 |
| Kato <sup>15</sup>      | 2016 | X          |                                                           | X          |    | X          |    | X          |                       | X          |    | Good                 |
| Khan <sup>16</sup>      | 2016 | X          |                                                           | X          |    | X          |    | X (barely) |                       | X          |    | Good                 |
| Kobayashi <sup>17</sup> | 2016 |            | X (pancreatic cancer only)                                | X          |    | X          |    | X          |                       | X          |    | Moderate             |
| Lye <sup>18</sup>       | 2016 | X          |                                                           | X          |    | X          |    | X          |                       | X          |    | Good                 |
| Okuwaki <sup>19</sup>   | 2016 |            | X (advanced pancreatic                                    | X          |    | X          |    | X          |                       | X          |    | Moderate             |

## Supplementary material

| Study                       | Year | Question 1 |                                         | Question 2 |    | Question 3 |                                               | Question 4 |    | Question 5 |    | Methodologic Quality |
|-----------------------------|------|------------|-----------------------------------------|------------|----|------------|-----------------------------------------------|------------|----|------------|----|----------------------|
|                             |      | Yes        | No                                      | Yes        | No | Yes        | No                                            | Yes        | No | Yes        | No |                      |
|                             |      |            | cancer or advanced biliary cancer only) |            |    |            |                                               |            |    |            |    |                      |
| J-H Park (1) <sup>20</sup>  | 2016 | X          |                                         | X          |    | X          |                                               | X          |    |            | NR | Moderate             |
| J-H Park (2) <sup>21</sup>  | 2016 |            | X (gastric cancer only)                 | X          |    | X          |                                               | X          |    | X          |    | Moderate             |
| Rademacher <sup>22</sup>    | 2016 | X          |                                         | X          |    | X          |                                               | X          |    | X          |    | Good                 |
| Sasaki <sup>23</sup>        | 2016 | X          |                                         | X          |    | X          |                                               | X          |    | X          |    | Good                 |
| Shin <sup>24</sup>          | 2016 | X          |                                         | X          |    | X          |                                               | X          |    | X          |    | Good                 |
| Tsauo <sup>25</sup>         | 2016 |            | X (pancreatic cancer only)              | X          |    | X          |                                               | X          |    | X          |    | Moderate             |
| Yamao <sup>26</sup>         | 2016 | X          |                                         | X          |    | X          |                                               | X          |    | X          |    | Good                 |
| Bulut <sup>27</sup>         | 2017 | X          |                                         | X          |    | X          |                                               | X          |    | X          |    | Good                 |
| Chen <sup>28</sup>          | 2017 | X          |                                         | X          |    | X          |                                               | X          |    | X          |    | Good                 |
| Hori <sup>29</sup>          | 2017 | X          |                                         | X          |    | X          |                                               | X          |    | X          |    | Good                 |
| Jang <sup>30</sup>          | 2017 |            | X (gastric cancer only)                 | X          |    |            | X (patients excluded for follow-up < 1 month) | X          |    | X          |    | Poor                 |
| Khashab <sup>31</sup>       | 2017 | X          |                                         | X          |    | X          |                                               | X          |    | X          |    | Good                 |
| Kim <sup>32</sup>           | 2017 |            | X (periampullary ca only)               | X          |    | X          |                                               | X          |    | X          |    | Moderate             |
| Ojima <sup>33</sup>         | 2017 |            | X (gastric cancer only)                 | X          |    | X          |                                               | X          |    |            | NR | Poor                 |
| Perez-Miranda <sup>34</sup> | 2017 | X          |                                         |            | X  | X          |                                               | X          |    | X          |    | Moderate             |
| Takahara <sup>35</sup>      | 2017 | X          |                                         | X          |    | X          |                                               | X          |    | X          |    | Good                 |
| Tanaka <sup>36</sup>        | 2017 |            | X (gastric cancer only)                 | X          |    | X          |                                               | X          |    |            | NR | Poor                 |
| Tsauo <sup>37</sup>         | 2017 | X          |                                         | X          |    | X          |                                               | X          |    | X          |    | Good                 |
| Ye <sup>38</sup>            | 2017 | X          |                                         | X          |    | X          |                                               | X          |    | X          |    | Good                 |
| Yoshida <sup>39</sup>       | 2017 |            | X (pancreatic cancer only)              | X          |    | X          |                                               | X          |    | X          |    | Moderate             |
| Bekheet <sup>40</sup>       | 2018 | X          |                                         | X          |    | X          |                                               | X          |    | X          |    | Good                 |
| Choi <sup>41</sup>          | 2018 | X          |                                         | X          |    | X          |                                               | X          |    | X          |    | Good                 |
| Leiyuan <sup>42</sup>       | 2018 | X          |                                         | X          |    | X          |                                               | X          |    |            | NR | Moderate             |
| Uemura <sup>43</sup>        | 2018 |            | X (pancreatic cancer only)              | X          |    | X          |                                               | X          |    | X          |    | Moderate             |
| Yukimoto <sup>44</sup>      | 2018 | X          |                                         | X          |    |            | NR                                            | X          |    | X          |    | Moderate             |
| Ge <sup>45</sup>            | 2019 | X          |                                         | X          |    | X          |                                               | X          |    | X          |    | Good                 |
| Jang <sup>46</sup>          | 2019 | X          |                                         | X          |    | X          |                                               | X          |    | X          |    | Good                 |

## Supplementary material

| Study                         | Year | Question 1 |                         | Question 2 |    | Question 3 |    | Question 4 |    | Question 5 |    | Methodologic Quality |
|-------------------------------|------|------------|-------------------------|------------|----|------------|----|------------|----|------------|----|----------------------|
|                               |      | Yes        | No                      | Yes        | No | Yes        | No | Yes        | No | Yes        | No |                      |
| Kerdsirichairat <sup>47</sup> | 2019 | X          |                         | X          |    |            |    | X          |    | X          |    | Good                 |
| Kumar <sup>48</sup>           | 2019 | X          |                         | X          |    | X          |    | X          |    | X          |    | Good                 |
| Ramos <sup>49</sup>           | 2019 |            | X (gastric cancer only) | X          |    | X          |    | X          |    |            | NR | Poor                 |
| Ratone <sup>50</sup>          | 2019 | X          |                         | X          |    | X          |    | X          |    | X          |    | Good                 |
| Sterpetti <sup>51</sup>       | 2019 | X          |                         | X          |    | X          |    | X          |    |            | NR | Moderate             |
| Alcala-Gonzalez <sup>52</sup> | 2020 | X          |                         | X          |    | X          |    | X          |    | X          |    | Good                 |
| Kastelijn <sup>53</sup>       | 2020 | X          |                         | X          |    | X          |    | X          |    | X          |    | Good                 |
| Miwa <sup>54</sup>            | 2020 | X          |                         | X          |    | X          |    | X          |    | X          |    | Good                 |
| Mo <sup>55</sup>              | 2020 | X          |                         | X          |    | X          |    | X          |    | X          |    | Good                 |
| Wu <sup>56</sup>              | 2020 | X          |                         | X          |    | X          |    | X          |    | X          |    | Good                 |
| Xu <sup>57</sup>              | 2020 | X          |                         | X          |    | X          |    | X          |    | X          |    | Good                 |
| Yildirim <sup>58</sup>        | 2020 | X          |                         | X          |    | X          |    | X          |    |            | NR | Moderate             |
| Hindryckx <sup>59</sup>       | 2021 | X          |                         |            | X  | X          |    | X          |    | X          |    | Moderate             |
| Kouanda <sup>60</sup>         | 2021 | X          |                         | X          |    | X          |    | X          |    | X          |    | Good                 |
| Yamao <sup>61</sup>           | 2021 | X          |                         | X          |    | X          |    | X          |    | X          |    | Good                 |

## Supplementary material

**eTable 3.** Analysis of heterogeneity by outcome and procedure in all studies.

| Procedure     | Outcome                         | # of Studies | # of Patients | I <sup>2</sup> (95% CI) |
|---------------|---------------------------------|--------------|---------------|-------------------------|
| Duodenal SEMS | Technical success               | 45           | 4413          | 65.6% (52.9% to 74.8%)  |
| EUS-GJ        | Technical success               | 8            | 245           | 67.4% (31.4% to 84.5%)  |
| Surgical GJ   | Technical success               | 13           | 564           | 0.0% (0.0% to 16.4%)    |
| Duodenal SEMS | Clinical success                | 45           | 4590          | 79.3% (72.7% to 84.2%)  |
| EUS-GJ        | Clinical success                | 8            | 245           | 54.6% (0.0% to 79.5%)   |
| Surgical GJ   | Clinical success                | 13           | 588           | 77.6% (62.1% to 86.8%)  |
| Duodenal SEMS | Preprocedural GOOSS score       | 27           | 2655          | 97.0% (96.3% to 97.5%)  |
| EUS-GJ        | Preprocedural GOOSS score       | 2            | 65            | 0.0% (., .)             |
| Surgical GJ   | Preprocedural GOOSS score       | 6            | 215           | 67.7% (23.3% to 86.4%)  |
| Duodenal SEMS | Postprocedural GOOSS score      | 19           | 2184          | 95.8% (94.6% to 96.8%)  |
| EUS-GJ        | Postprocedural GOOSS score      | 2            | 59            | 95.1% (85.5% to 98.4%)  |
| Surgical GJ   | Postprocedural GOOSS score      | 5            | 180           | 99.0% (98.5% to 99.3%)  |
| Duodenal SEMS | Recurrence of GOO               | 11           | 573           | 83.4% (71.8% to 90.3%)  |
| EUS-GJ        | Recurrence of GOO               | 1            | 25            | ---                     |
| Surgical GJ   | Recurrence of GOO               | 8            | 342           | 48.6% (0.0% to 77.1%)   |
| Duodenal SEMS | Reintervention                  | 33           | 2963          | 81.3% (74.4% to 86.3%)  |
| EUS-GJ        | Reintervention                  | 4            | 129           | 44.3% (0.0% to 81.4%)   |
| Surgical GJ   | Reintervention                  | 9            | 418           | 75.3% (52.5% to 87.2%)  |
| Duodenal SEMS | Procedure Related Complications | 43           | 4285          | 91.6% (89.6% to 93.2%)  |
| EUS-GJ        | Procedure Related Complications | 6            | 189           | 0.0% (0.0% to 65.4%)    |
| Surgical GJ   | Procedure Related Complications | 16           | 746           | 67.0% (44.3% to 80.5%)  |
| Duodenal SEMS | Bleeding                        | 25           | 2854          | 65.1% (46.7% to 77.2%)  |
| EUS-GJ        | Bleeding                        | 4            | 141           | 57.0% (0.0% to 85.7%)   |
| Surgical GJ   | Bleeding                        | 9            | 412           | 0.0% (0.0% to 16.7%)    |
| Duodenal SEMS | Perforation                     | 24           | 2823          | 21.1% (0.0% to 52.2%)   |
| EUS-GJ        | Perforation                     | 3            | 105           | 65.7% (0.0% to 90.1%)   |
| Surgical GJ   | Perforation                     | 3            | 170           | 47.5% (0.0% to 84.6%)   |
| Duodenal SEMS | Stent migration                 | 33           | 3451          | 60.7% (42.6% to 73.1%)  |
| EUS-GJ        | Stent migration                 | 4            | 116           | 69.6% (12.4% to 89.4%)  |
| Duodenal SEMS | Stent occlusion                 | 22           | 1993          | 92.2% (89.5% to 94.2%)  |
| EUS-GJ        | Stent occlusion                 | 3            | 69            | 22.6% (0.0% to 92.0%)   |
| Duodenal SEMS | Tissue ingrowth                 | 22           | 2172          | 85.7% (79.7% to 90.0%)  |
| EUS-GJ        | Tissue ingrowth                 | 1            | 24            | ---                     |
| Duodenal SEMS | Stent patency                   | 3            | 140           | 0.0% (0.0% to 87.6%)    |
| Duodenal SEMS | Tissue overgrowth               | 20           | 1962          | 45.4% (7.8% to 67.7%)   |
| Surgical GJ   | Laparoscopic complication       | 5            | 196           | 76.8% (43.8% to 90.5%)  |
| Duodenal SEMS | Deaths reported in AE section   | 26           | 2151          | 70.8% (56.6% to 80.4%)  |
| EUS-GJ        | Deaths reported in AE section   | 4            | 151           | 76.5% (35.7% to 91.4%)  |
| Surgical GJ   | Deaths reported in AE section   | 8            | 421           | 54.6% (0.0% to 79.5%)   |

## Supplementary material

SEMS self-expanding metal stent EUS-GJ endoscopic ultrasound-guided gastrojejunostomy  
GOO gastric outlet obstruction GOOSS Gastric Outlet Obstruction Scoring System AE adverse event

## Supplementary material

**eTable 4.** Publication bias testing

| Outcome                       | Rank correlation test of funnel plot asymmetry [Begg and Mazumdar] |        |             | Rank correlation test of funnel plot asymmetry (with continuity correction) [Begg and Mazumdar] |        |             | Linear regression test of funnel plot asymmetry [Eggers] |        |             |
|-------------------------------|--------------------------------------------------------------------|--------|-------------|-------------------------------------------------------------------------------------------------|--------|-------------|----------------------------------------------------------|--------|-------------|
|                               | Duodenal SEMS                                                      | EUS-GJ | Surgical GJ | Duodenal SEMS                                                                                   | EUS-GJ | Surgical GJ | Duodenal SEMS                                            | EUS-GJ | Surgical GJ |
| Technical success             | 0.0869                                                             | 0.7084 | 0.0016      | 0.0887                                                                                          | 0.8031 | 0.0020      | 0.6243                                                   | 0.4396 | 0.0051      |
| Clinical success              | 0.7394                                                             | 0.1051 | 0.9513      | 0.7468                                                                                          | 0.1346 | 1.0000      | 0.5886                                                   | 0.1681 | 0.5438      |
| Preprocedural GOOSS score     | 0.5455                                                             | 3.0000 | 0.3476      | 0.5594                                                                                          | 3.0000 | 0.4524      | 0.0006                                                   | 3.0000 | 0.3233      |
| Postprocedural GOOSS score    | 0.1955                                                             | 3.0000 | 0.6242      | 0.2079                                                                                          | 3.0000 | 0.8065      | 0.0517                                                   | 3.0000 | 0.5875      |
| Recurrence of GOO             | 0.4835                                                             | 3.0000 | 0.8046      | 0.5334                                                                                          | 3.0000 | 0.9015      | 0.6230                                                   | 3.0000 | 0.5985      |
| Reintervention                | 0.1453                                                             | 0.4969 | 0.1707      | 0.1496                                                                                          | 0.7341 | 0.2060      | 0.1658                                                   | 0.4270 | 0.0918      |
| Procedural complications      | 0.3460                                                             | 0.0195 | 0.0701      | 0.3514                                                                                          | 0.0323 | 0.0774      | 0.6682                                                   | 0.0671 | 0.0739      |
| Bleeding                      | 0.3382                                                             | 0.7180 | 0.8348      | 0.3501                                                                                          | 1.0000 | 0.9170      | 0.0626                                                   | 0.5224 | 0.1233      |
| Perforation                   | 0.4560                                                             | 0.1172 | 0.6015      | 0.4712                                                                                          | 0.2963 | 1.0000      | 0.9056                                                   | 0.0992 | 0.8675      |
| Stent migration               | 0.7683                                                             | 0.2786 | ---         | 0.7801                                                                                          | 0.4701 | ---         | 0.8298                                                   | 0.0709 | ---         |
| Stent occlusion               | 0.5726                                                             | 0.6015 | ---         | 0.5920                                                                                          | 1.0000 | ---         | 0.8978                                                   | 0.5684 | ---         |
| Tissue ingrowth               | 0.2587                                                             | 3.0000 | ---         | 0.2708                                                                                          | 3.0000 | ---         | 0.1399                                                   | 3.0000 | ---         |
| Stent patency                 | 0.1172                                                             | ---    | ---         | 0.2963                                                                                          | ---    | ---         | 0.2048                                                   | ---    | ---         |
| Tissue overgrowth             | 0.0349                                                             | ---    | ---         | 0.0378                                                                                          | ---    | ---         | 0.0445                                                   | ---    | ---         |
| Laparoscopic complication     | ---                                                                | ---    | 0.6242      | ---                                                                                             | ---    | 0.8065      | ---                                                      | ---    | 0.6699      |
| Deaths reported in AE section | 0.1280                                                             | 1.0000 | 1.0000      | 0.1336                                                                                          | 1.0000 | 1.0000      | 0.8817                                                   | 0.7039 | 0.7236      |

All numbers are p-values from the rank correlation or linear regression tests for funnel plot symmetry.

\* - the test could not be conducted for the EUS-GJ studies because only 1 study was available.

## Supplementary material

**eFigure 1.** Funnel plots for studies of duodenal SEMS compared to EUS-GJ and surgical GJ: efficacy outcomes: (A) clinical success, (B) preprocedural GOOSS score, (C) postprocedural GOOSS score, (D) recurrence of GOO, and (E) reintervention; safety outcomes: (F) bleeding (G) perforation, (H) stent migration, (I) stent occlusion, (J) tissue ingrowth, (K) stent patency, (L) tissue overgrowth, (M) deaths reported in AE section

## A. Clinical success

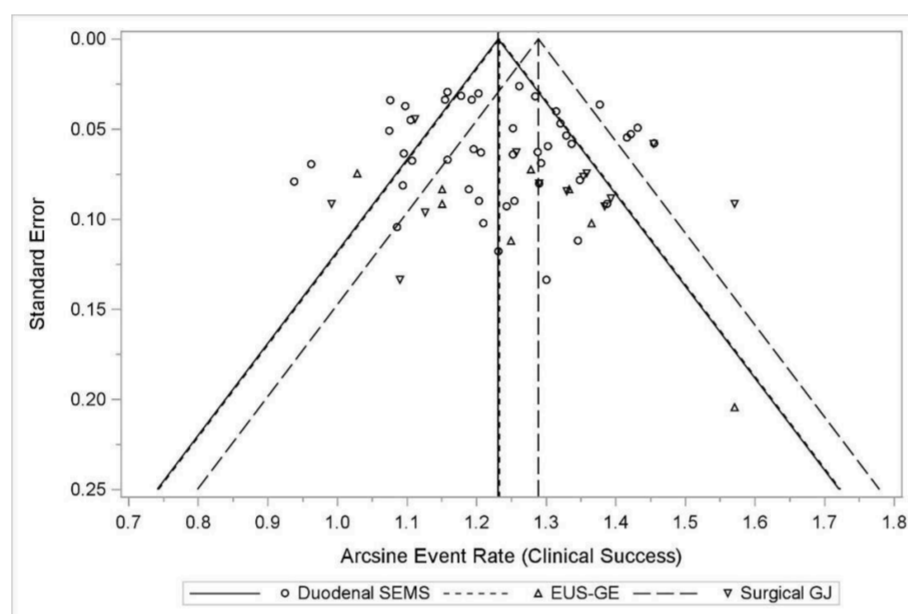

## B. Preprocedural GOOSS score

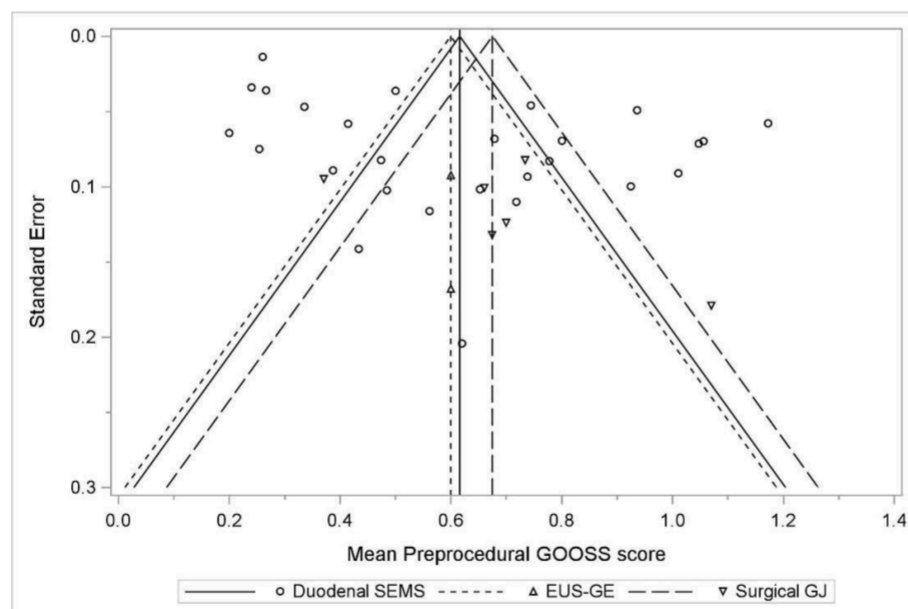



## Supplementary material

## C. Postprocedural GOOSS score

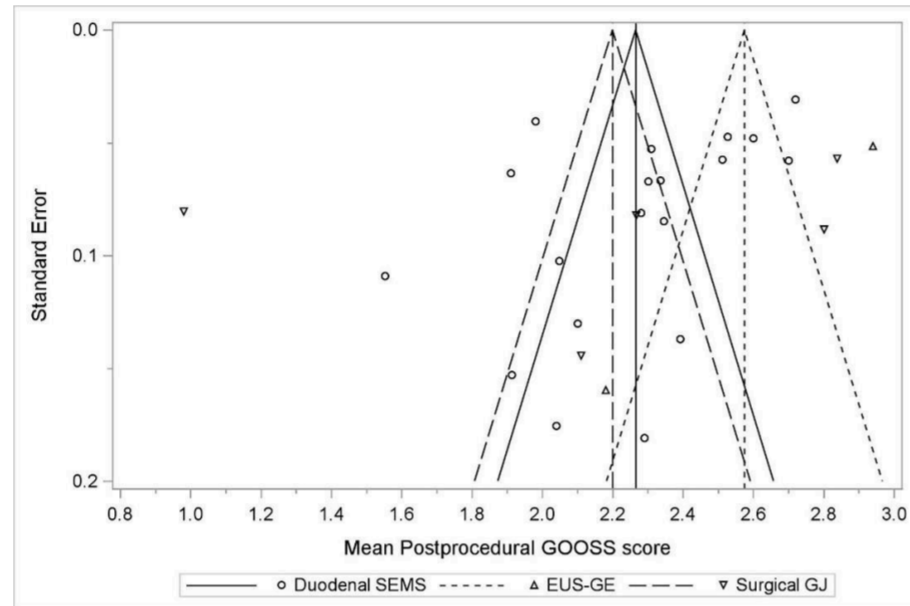

## D. Recurrence of GOO

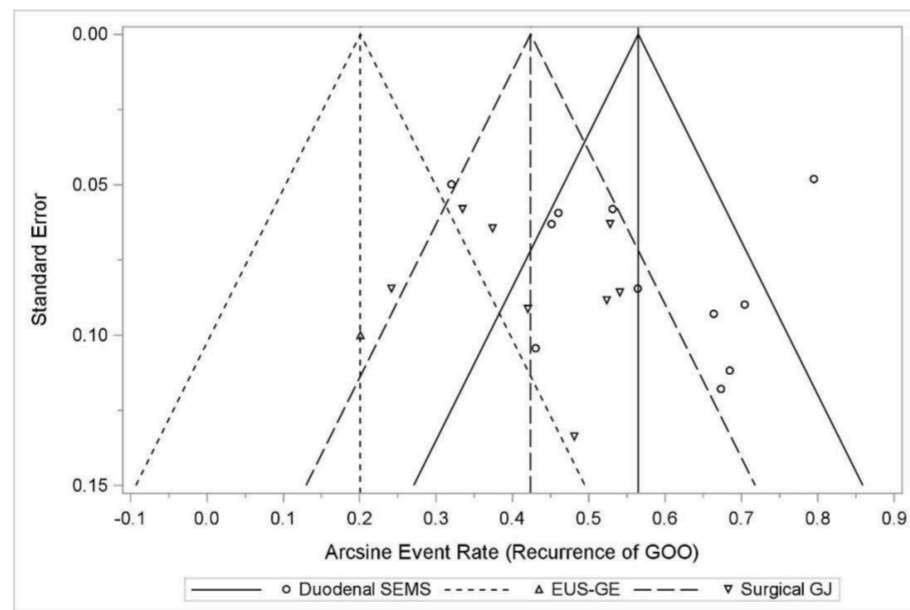

## Supplementary material

## E. Reintervention

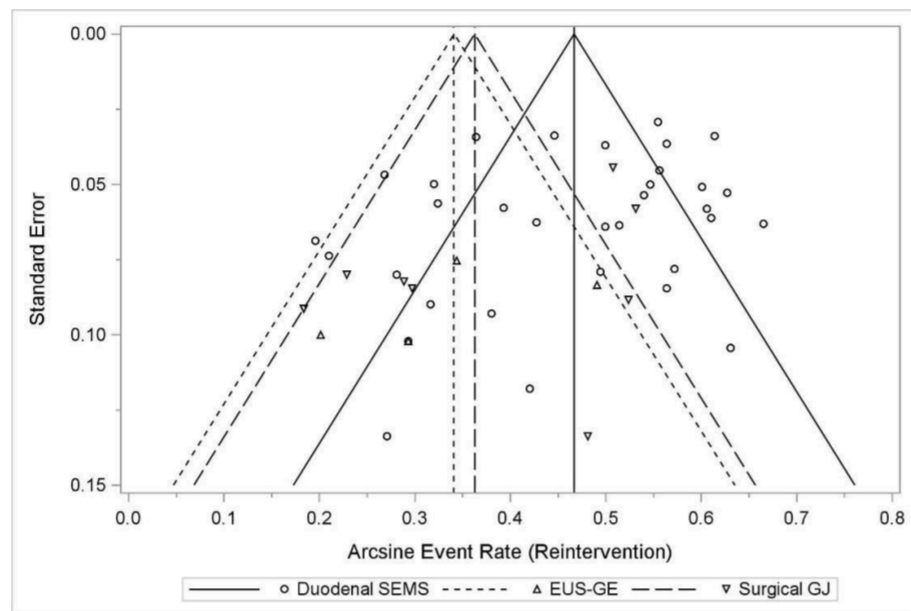

## F. Bleeding

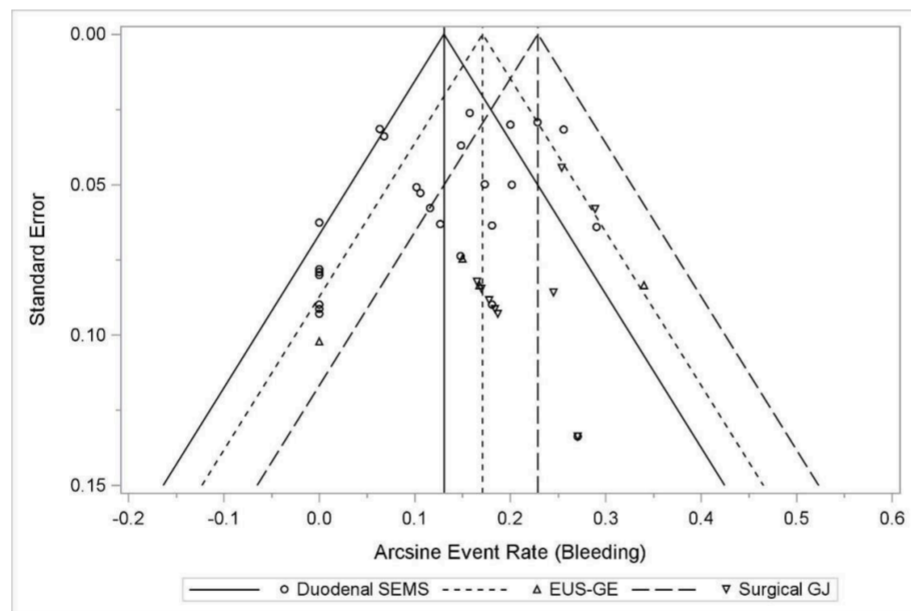

## Supplementary material

## G. Perforation

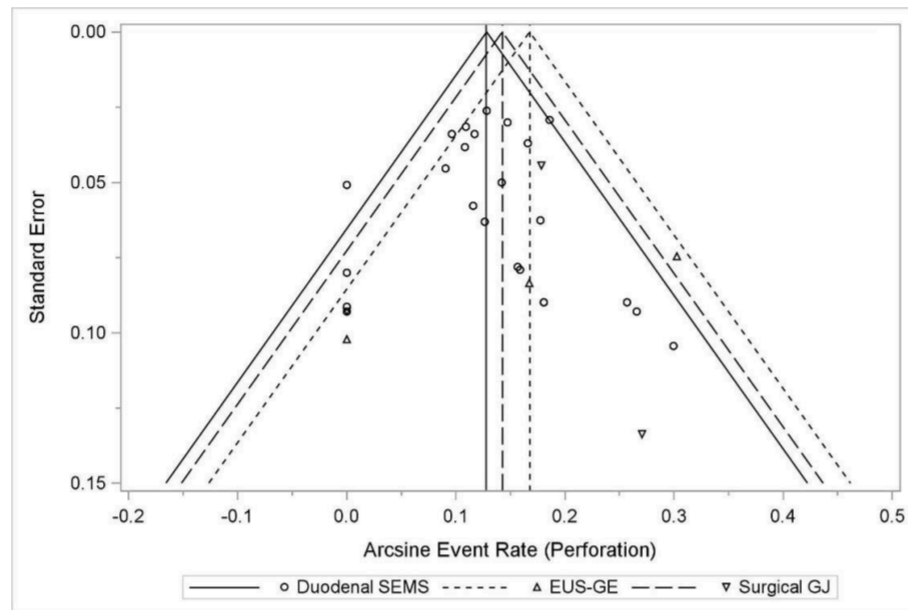

## H. Stent migration

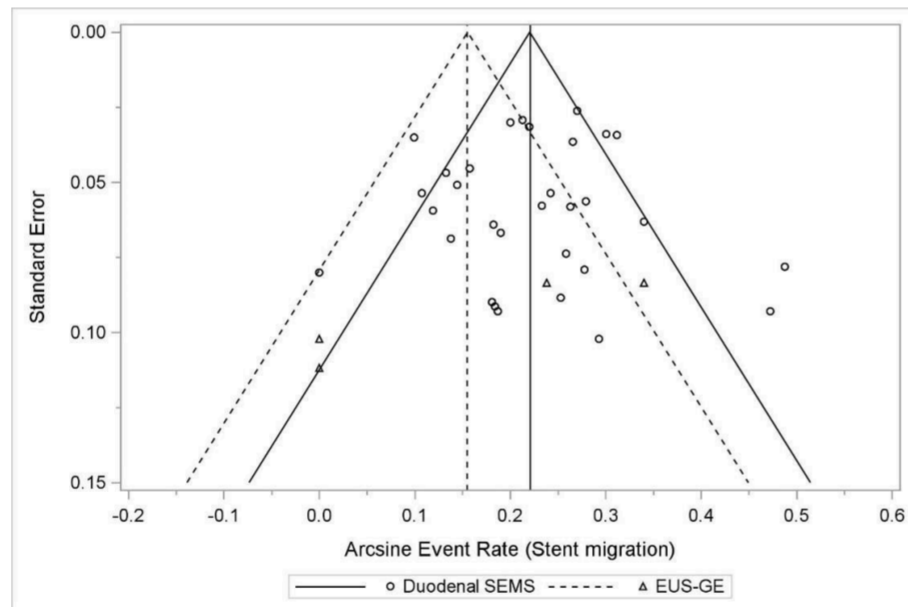

## Supplementary material

## I. Stent occlusion

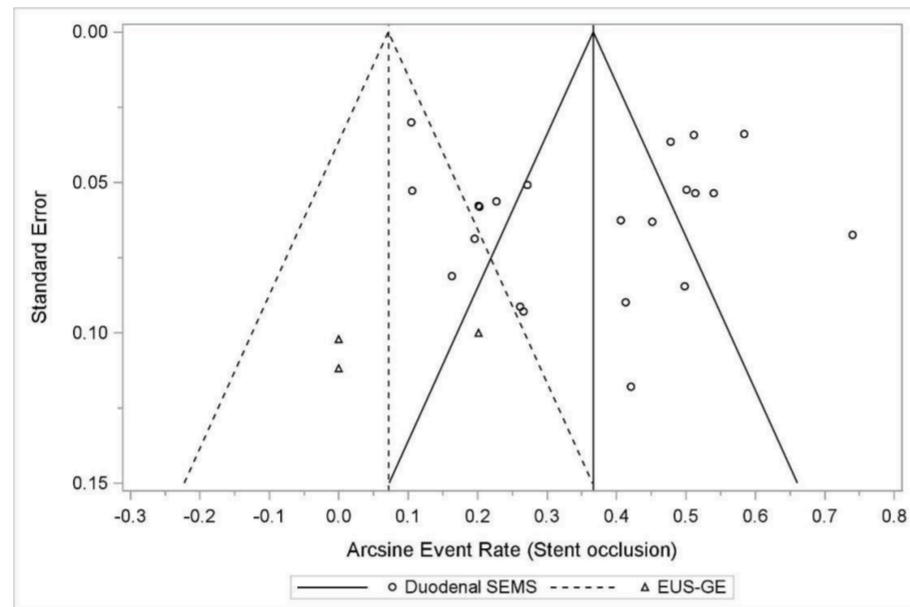

## J. Tissue ingrowth

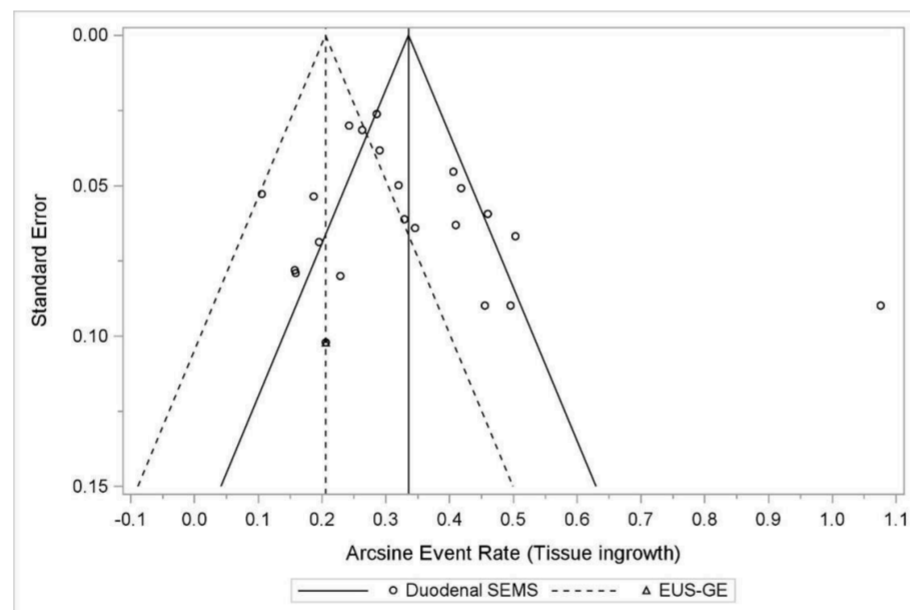

## Supplementary material

## K. Stent patency

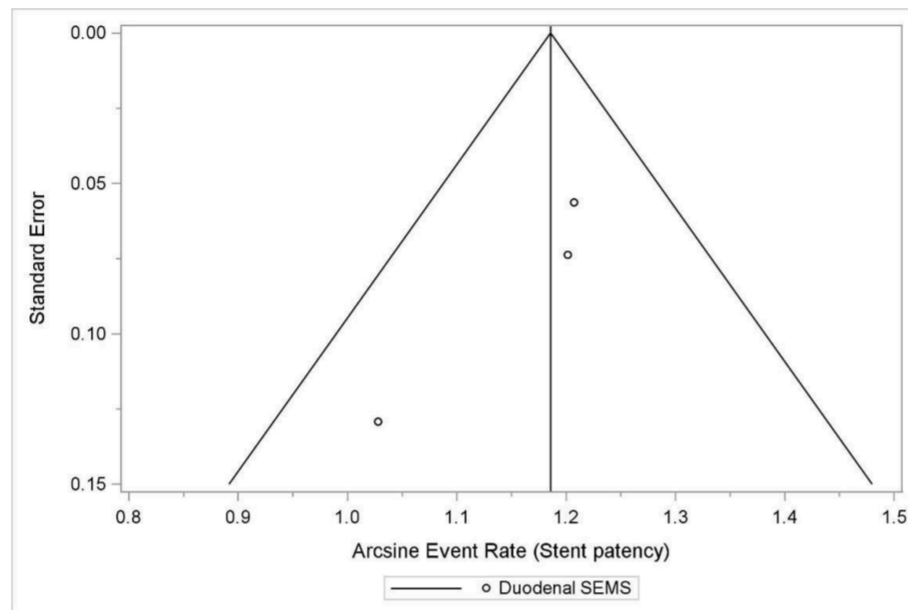

## L. Tissue overgrowth

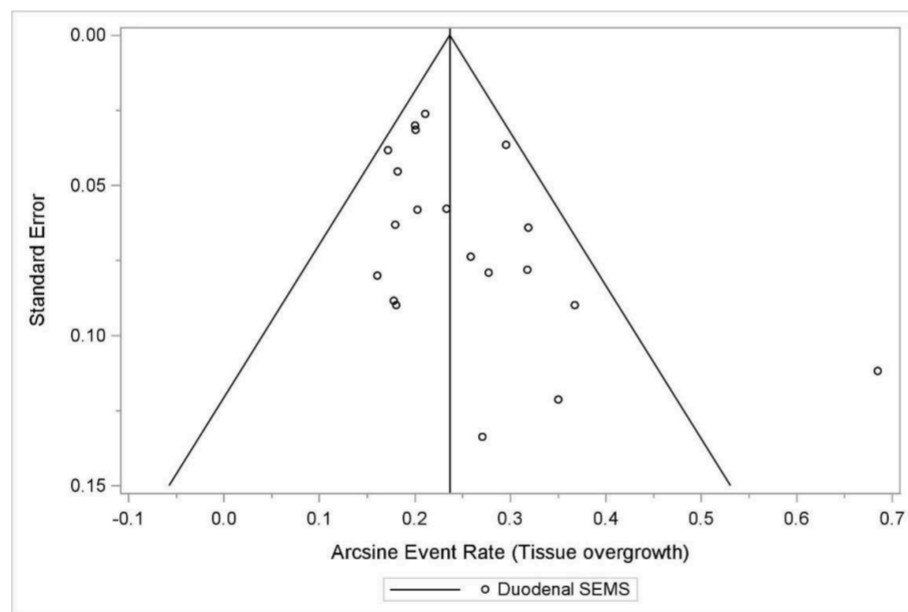

## Supplementary material

## M. Deaths reported in AE section

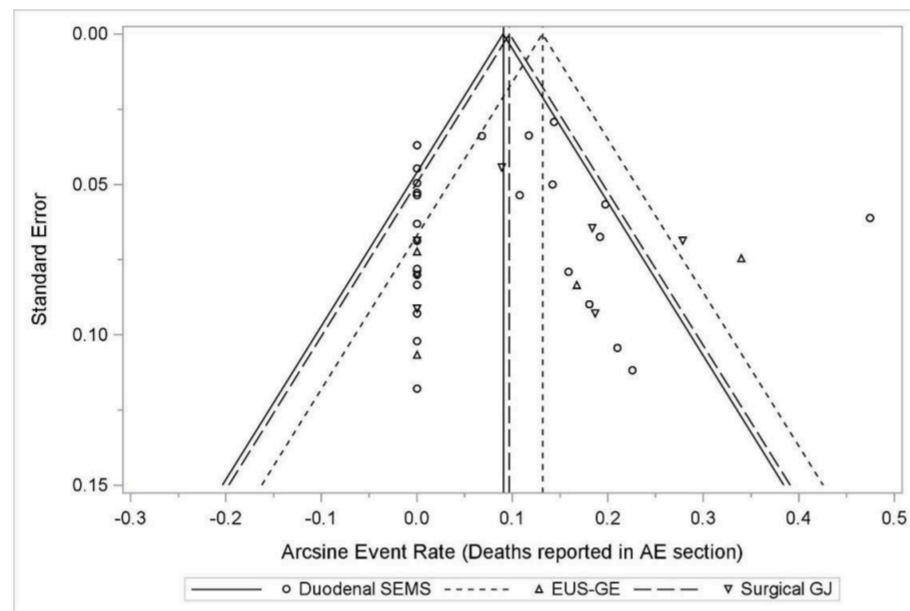

## Supplementary material

## References

1. Chiu KW, Razack A, Maraveyas A. Self-expandable metal stent placement for malignant duodenal obstruction distal to the bulb. *Eur J Gastroenterol Hepatol* 2015;27:1466-72.
2. Kim JW, Jeong JB, Lee KL, et al. Comparison between uncovered and covered self-expandable metal stent placement in malignant duodenal obstruction. *World J Gastroenterol* 2015;21:1580-7.
3. Kim SH, Chun HJ, Yoo IK, et al. Predictors of the patency of self-expandable metallic stents in malignant gastroduodenal obstruction. *World J Gastroenterol* 2015;21:9134-41.
4. Lee H, Min BH, Lee JH, et al. Covered metallic stents with an anti-migration design vs. uncovered stents for the palliation of malignant gastric outlet obstruction: a multicenter, randomized trial. *Am J Gastroenterol* 2015;110:1440-9.
5. Lee JE, Lee K, Hong YS, et al. Impact of Carcinomatosis on Clinical Outcomes after Self-Expandable Metallic Stent Placement for Malignant Gastric Outlet Obstruction. *PLoS One* 2015;10:e0140648.
6. Oh D, Lee SS, Song TJ, et al. Efficacy and safety of a partially covered duodenal stent for malignant gastroduodenal obstruction: a pilot study. *Gastrointest Endosc* 2015;82:32-36 e1.
7. Oh SY, Edwards A, Mandelson M, et al. Survival and clinical outcome after endoscopic duodenal stent placement for malignant gastric outlet obstruction: comparison of pancreatic cancer and nonpancreatic cancer. *Gastrointest Endosc* 2015;82:460-8 e2.
8. Park CH, Park JC, Kim EH, et al. Impact of carcinomatosis and ascites status on long-term outcomes of palliative treatment for patients with gastric outlet obstruction caused by unresectable gastric cancer: stent placement versus palliative gastrojejunostomy. *Gastrointest Endosc* 2015;81:321-32.
9. Sato T, Hara K, Mizuno N, et al. Gastroduodenal stenting with Niti-S stent: long-term benefits and additional stent intervention. *Dig Endosc* 2015;27:121-9.
10. Trotter JM, Balamurugan R, Dear KL, et al. Non-centralised service for palliative stenting of malignant gastric outlet obstruction. *Ann R Coll Surg Engl* 2015;97:32-4.
11. Fiori E, Sterpetti AV, De Cesare A, et al. Factors Leading to Improved Results for Endoscopic Stenting for Metastatic Antropyloric Adenocarcinoma. A Comparison with Gastrojejunostomy. *J Gastrointest Surg* 2016;20:1802-1806.
12. Grunwald D, Cohen J, Bartley A, et al. The location of obstruction predicts stent occlusion in malignant gastric outlet obstruction. *Therap Adv Gastroenterol* 2016;9:815-822.
13. Itoi T, Ishii K, Ikeuchi N, et al. Prospective evaluation of endoscopic ultrasonography-guided double-balloon-occluded gastrojejunostomy bypass (EPASS) for malignant gastric outlet obstruction. *Gut* 2016;65:193-5.
14. Jung K, Ahn JY, Jung HY, et al. Outcomes of endoscopically inserted self-expandable metal stents in malignancy according to the type of stent and the site of obstruction. *Surg Endosc* 2016;30:4001-10.
15. Kato H, Kawamoto H, Matsumoto K, et al. Outcome of self-expandable metallic stent deployment in patients with malignant gastroduodenal outlet obstruction and Niti-S and WallFlex comparison: a multicenter retrospective clinical study. *J Dig Dis* 2016;17:518-525.
16. Khan H, Zhining F, Ghafoor A, et al. Palliative treatment of malignant gastric outlet obstruction with self expandable metal stents. *Journal of Postgraduate Medical Institute* 2016;30:213-217.
17. Kobayashi K, Kobara H, Masaki T. Splenic arterial injury caused by use of a lumen-apposing metal stent for walled-off pancreatic necrosis drainage. *Dig Endosc* 2019;31:331.

## Supplementary material

18. Lye TJ, Goh YC, Eng AK, et al. Endoscopic self-expandable metallic stenting for palliation of malignant gastric outlet obstruction in Southeast Asia. *ANZ J Surg* 2016;86:464-8.
19. Okuwaki K, Kida M, Yamauchi H, et al. Randomized controlled exploratory study comparing the usefulness of two types of metallic stents with different axial forces for the management of duodenal obstruction caused by pancreatobiliary cancer. *J Hepatobiliary Pancreat Sci* 2016;23:289-97.
20. Park JH, Lee JH, Song HY, et al. Over-the-wire versus through-the-scope stents for the palliation of malignant gastric outlet obstruction: A retrospective comparison study. *Eur Radiol* 2016;26:4249-4258.
21. Park JH, Song HY, Yun SC, et al. Gastroduodenal stent placement versus surgical gastrojejunostomy for the palliation of gastric outlet obstructions in patients with unresectable gastric cancer: a propensity score-matched analysis. *Eur Radiol* 2016;26:2436-45.
22. Rademacher C, Bechtler M, Schneider S, et al. Self-expanding metal stents for the palliation of malignant gastric outlet obstruction in patients with peritoneal carcinomatosis. *World J Gastroenterol* 2016;22:9554-9561.
23. Sasaki R, Sakai Y, Tsuyuguchi T, et al. Endoscopic management of unresectable malignant gastroduodenal obstruction with a nitinol uncovered metal stent: A prospective Japanese multicenter study. *World J Gastroenterol* 2016;22:3837-44.
24. Shin YS, Choi CW, Kang DH, et al. Factors associated with clinical failure of self-expandable metal stent for malignant gastroduodenal obstruction. *Scand J Gastroenterol* 2016;51:103-10.
25. Tsao J, Yoo MW, Song HY, et al. Partially-covered stent placement versus surgical gastrojejunostomy for the palliation of malignant gastroduodenal obstruction secondary to pancreatic cancer. *Abdom Radiol (NY)* 2016;41:2233-2240.
26. Yamao K, Kitano M, Kayahara T, et al. Factors predicting through-the-scope gastroduodenal stenting outcomes in patients with gastric outlet obstruction: a large multicenter retrospective study in West Japan. *Gastrointest Endosc* 2016;84:757-763 e6.
27. Bulut E, Ciftci T, Akhan O, et al. Palliation of malignant gastroduodenal obstruction: fluoroscopic metallic stent placement with different approaches. *Diagn Interv Radiol* 2017;23:211-216.
28. Chen YI, Itoi T, Baron TH, et al. EUS-guided gastroenterostomy is comparable to enteral stenting with fewer re-interventions in malignant gastric outlet obstruction. *Surg Endosc* 2017;31:2946-2952.
29. Hori Y, Naitoh I, Hayashi K, et al. Predictors of stent dysfunction after self-expandable metal stent placement for malignant gastric outlet obstruction: tumor ingrowth in uncovered stents and migration of covered stents. *Surg Endosc* 2017;31:4165-4173.
30. Jang SH, Lee H, Min BH, et al. Palliative gastrojejunostomy versus endoscopic stent placement for gastric outlet obstruction in patients with unresectable gastric cancer: a propensity score-matched analysis. *Surg Endosc* 2017;31:4217-4223.
31. Khashab MA, Bukhari M, Baron TH, et al. International multicenter comparative trial of endoscopic ultrasonography-guided gastroenterostomy versus surgical gastrojejunostomy for the treatment of malignant gastric outlet obstruction. *Endosc Int Open* 2017;5:E275-E281.
32. Kim HJ. Clinical outcomes of biliary and duodenal self-expandable metal stent placements for palliative treatment in patients with periampullary cancer. *Gastrointestinal Intervention* 2017;6:171-175.



## Supplementary material

33. Ojima T, Nakamori M, Nakamura M, et al. Laparoscopic Gastrojejunostomy for Patients with Unresectable Gastric Cancer with Gastric Outlet Obstruction. *J Gastrointest Surg* 2017;21:1220-1225.
34. Perez-Miranda M, Tyberg A, Poletto D, et al. EUS-guided Gastrojejunostomy Versus Laparoscopic Gastrojejunostomy: An International Collaborative Study. *J Clin Gastroenterol* 2017;51:896-899.
35. Takahara N, Isayama H, Nakai Y, et al. A Novel Partially Covered Self-Expandable Metallic Stent with Proximal Flare in Patients with Malignant Gastric Outlet Obstruction. *Gut Liver* 2017;11:481-488.
36. Tanaka T, Suda K, Satoh S, et al. Effectiveness of laparoscopic stomach-partitioning gastrojejunostomy for patients with gastric outlet obstruction caused by advanced gastric cancer. *Surg Endosc* 2017;31:359-367.
37. Tsao J, Yoo MW, Park JH, et al. Overlapping self-expandable metallic stent for palliation of a long (>10 cm) malignant gastroduodenal obstruction. *Acta Radiol* 2017;58:565-572.
38. Ye BW, Chou CK, Hsieh YC, et al. Metallic Stent Expansion Rate at Day One Predicts Stent Patency in Patients with Gastric Outlet Obstruction. *Dig Dis Sci* 2017;62:1286-1294.
39. Yoshida Y, Fukutomi A, Tanaka M, et al. Gastrojejunostomy versus duodenal stent placement for gastric outlet obstruction in patients with unresectable pancreatic cancer. *Pancreatology* 2017;17:983-989.
40. Bekheet N, Kim MT, Park JH, et al. Fluoroscopic Gastroduodenal Stent Placement in 55 Patients with Endoscopic Stent Placement Failure. *Cardiovasc Intervent Radiol* 2018;41:1233-1240.
41. Choi YK, Ahn JY, Na HK, et al. Winged Partially Covered Self-Expandable Metal Stent to Prevent Distal Migration in Malignant Gastric Outlet Obstruction. *Dig Dis Sci* 2018;63:3409-3416.
42. Leiyuan S, Jianli X, Zhengzhong Z, et al. Comparison of Treatment Outcomes of Endoscopic Stenting and Laparoscopic Gastrojejunostomy for Malignant Gastric Outlet Obstruction. *Am Surg* 2018;84:991-995.
43. Uemura S, Iwashita T, Iwata K, et al. Endoscopic duodenal stent versus surgical gastrojejunostomy for gastric outlet obstruction in patients with advanced pancreatic cancer. *Pancreatology* 2018;18:601-607.
44. Yukimoto T, Morisaki T, Komukai S, et al. The Palliative Effect of Endoscopic Uncovered Self-expandable Metallic Stent Placement Versus Gastrojejunostomy on Malignant Gastric Outlet Obstruction: A Pilot Study with a Retrospective Chart Review in Saga, Japan. *Intern Med* 2018;57:1517-1521.
45. Ge PS, Young JY, Dong W, et al. EUS-guided gastroenterostomy versus enteral stent placement for palliation of malignant gastric outlet obstruction. *Surg Endosc* 2019;33:3404-3411.
46. Jang S, Stevens T, Lopez R, et al. Superiority of Gastrojejunostomy Over Endoscopic Stenting for Palliation of Malignant Gastric Outlet Obstruction. *Clin Gastroenterol Hepatol* 2019;17:1295-1302 e1.
47. Kerdsirichairat T, Irani S, Yang J, et al. Durability and long-term outcomes of direct EUS-guided gastroenterostomy using lumen-apposing metal stents for gastric outlet obstruction. *Endosc Int Open* 2019;7:E144-E150.

## Supplementary material

48. Kumar V, Ghoshal UC, Mohindra S, et al. Palliation of malignant gastroduodenal obstruction with self-expandable metal stent using side- and forward-viewing endoscope: Feasibility and outcome. *JGH Open* 2019;3:65-70.
49. Ramos M, Barchi LC, de Oliveira RJ, et al. Gastric partitioning for the treatment of malignant gastric outlet obstruction. *World J Gastrointest Oncol* 2019;11:1161-1171.
50. Ratone JP, Caillol F, Zemmour C, et al. Outcomes of duodenal stenting: Experience in a French tertiary center with 220 cases. *Dig Liver Dis* 2020;52:51-56.
51. Sterpetti AV, Fiori E, Sapienza P, et al. Complications After Endoscopic Stenting for Malignant Gastric Outlet Obstruction: A Cohort Study. *Surg Laparosc Endosc Percutan Tech* 2019;29:169-172.
52. Alcala-Gonzalez L, Masachs Perecaula M, Dot Bach J, et al. Endoscopic stenting for gastroduodenal outlet obstruction of a malignant origin, real life experience in a single center. *Rev Esp Enferm Dig* 2020;112:712-715.
53. Kastelijns JB, Moons LMG, Garcia-Alonso FJ, et al. Patency of endoscopic ultrasound-guided gastroenterostomy in the treatment of malignant gastric outlet obstruction. *Endosc Int Open* 2020;8:E1194-E1201.
54. Miwa H, Sugimori K, Kaneko T, et al. Clinical outcome of a highly flexible duodenal stent for gastric outlet obstruction: A multicenter prospective study. *JGH Open* 2020;4:729-735.
55. Mo JW, Kim YM, Kim JH, et al. Clinical outcomes after multiple self-expandable metallic stent placement using stent-in-stent technique for malignant gastric outlet obstruction. *Medicine (Baltimore)* 2020;99:e19432.
56. Wu CH, Lee MH, Tsou YK, et al. Efficacy and Adverse Effects of Self-Expandable Metal Stent Placement for Malignant Duodenal Obstruction: The Papilla of Vater as a Landmark. *Cancer Manag Res* 2020;12:10261-10269.
57. Xu MM, Dawod E, Gaidhane M, et al. Reverse Endoscopic Ultrasound-Guided Gastrojejunostomy for the Treatment of Superior Mesenteric Artery Syndrome: A New Concept. *Clin Endosc* 2020;53:94-96.
58. Yildirim R, Candas B, Usta AA, et al. Efficacy of stomach-partitioning on gastric emptying in patients undergoing palliative gastrojejunostomy for malignant gastric outlet obstruction. *Ulus Travma Acil Cerrahi Derg* 2020;26:678-684.
59. Hindryckx P, Degroote H. Lumen-apposing metal stents for approved and off-label indications: a single-centre experience. *Surg Endosc* 2021;35:6013-6020.
60. Kouanda A, Binmoeller K, Hamerski C, et al. Endoscopic ultrasound-guided gastroenterostomy versus open surgical gastrojejunostomy: clinical outcomes and cost effectiveness analysis. *Surg Endosc* 2021;35:7058-7067.
61. Yamao K, Kitano M, Chiba Y, et al. Endoscopic placement of covered versus uncovered self-expandable metal stents for palliation of malignant gastric outlet obstruction. *Gut* 2021;70:1244-1252.
